# Supplementary material for: A mathematical and computational framework to predict the time to and recovery from osteoporosis via serial DEXA scans: a proof-of-concept model for digital decision support
Source: Research Square preprint supplement (doi:10.21203/rs.3.rs-8028195/v1), 2026-01-02
Supplement: Supplementary file 1 [file fb91aed2ba1f8fb7a7d4cf16.docx]

**ASCII Methods Schematics Box**

DATA SOURCE

---------------------------------

Retrospective anonymised DEXA data

50 patients with ≥2 hip scans

University Hospital Limerick

---------------------------------

|

v

DATA PRE-PROCESSING

---------------------------------

• Extract total hip T-scores

• Validate and clean values

• Enter age + T-score pairs

• Prepare dataset for modelling

---------------------------------

|

v

TRAJECTORY MODELLING

---------------------------------

Two-point model (TTOc / TEOc)

- Calculate slope and intercept

- Solve threshold crossing (T = –2.5)

Multipoint regression (TTOt)

- Fit least-squares line

- Compute threshold-crossing age

---------------------------------

|

v

NON-GENERATING LOGIC

---------------------------------

• Upward slope in non-OP range

• Downward slope in OP range

→ No TTO/TEO generated

---------------------------------

|

v

OUTPUTS

---------------------------------

• TTO (age at entry to OP)

• TEO (age at recovery)

• Trajectory plots

---------------------------------
